# Supplementary material for: Trade-Off Between Enzymatic Antioxidant Defense and Accumulation of Organic Metabolite Affects Salt Tolerance of White Clover Associated with Redox, Water, and Metabolic Homeostases
Source: MDPI journal article supplement (doi:10.3390/plants14020145), 2025-01-07
Supplement: s1 [file s1]

**Table S1** Effects of cultivar, stress treatment, and their interactions on all parameters were analyzed by using two-way ANOVA. The “\*\*\*\*” indicates  $p < 0.001$ .

| Parameter                             | Item               | Quadratic sum | Mean square | <i>F</i> | <i>p</i>  |
|---------------------------------------|--------------------|---------------|-------------|----------|-----------|
| Chl a content                         | Cultivar           | 137.79        | 137.79      | 38.31    | 0.000**** |
|                                       | Treatment          | 27.64         | 27.64       | 7.68     | 0.024     |
|                                       | Cultivar&Treatment | 21.43         | 21.43       | 5.96     | 0.040     |
| Chl b content                         | Cultivar           | 0.53          | 0.53        | 6.17     | 0.038     |
|                                       | Treatment          | 28.42         | 28.42       | 328.80   | 0.000**** |
|                                       | Cultivar&Treatment | 7.40          | 7.40        | 85.65    | 0.000**** |
| Chl a/b                               | Cultivar           | 5.75          | 5.75        | 39.06    | 0.000**** |
|                                       | Treatment          | 0.73          | 0.73        | 4.96     | 0.056     |
|                                       | Cultivar&Treatment | 0.15          | 0.15        | 1.03     | 0.340     |
| Total chl content                     | Cultivar           | 111.54        | 111.54      | 25.03    | 0.001     |
|                                       | Treatment          | 210.01        | 210.01      | 47.13    | 0.000**** |
|                                       | Cultivar&Treatment | 21.65         | 21.65       | 4.86     | 0.059     |
| Relative water content                | Cultivar           | 239.83        | 239.83      | 35.10    | 0.000**** |
|                                       | Treatment          | 627.21        | 627.21      | 91.80    | 0.000**** |
|                                       | Cultivar&Treatment | 261.86        | 261.86      | 38.33    | 0.000**** |
| Osmotic potential                     | Cultivar           | 0.33          | 0.33        | 203.04   | 0.000**** |
|                                       | Treatment          | 1.59          | 1.59        | 985.50   | 0.000**** |
|                                       | Cultivar&Treatment | 0.29          | 0.29        | 179.44   | 0.000**** |
| Electrolyte leakage                   | Cultivar           | 70.78         | 70.78       | 8.74     | 0.018     |
|                                       | Treatment          | 2663.92       | 2663.92     | 329.01   | 0.000**** |
|                                       | Cultivar&Treatment | 120.00        | 120.00      | 14.82    | 0.005     |
| MDA content                           | Cultivar           | 42.75         | 42.75       | 37.06    | 0.000**** |
|                                       | Treatment          | 93.58         | 93.58       | 81.12    | 0.000**** |
|                                       | Cultivar&Treatment | 65.30         | 65.30       | 56.60    | 0.000**** |
| H <sub>2</sub> O <sub>2</sub> content | Cultivar           | 20.15         | 20.15       | 19.15    | 0.002     |
|                                       | Treatment          | 30.29         | 30.29       | 28.79    | 0.001     |
|                                       | Cultivar&Treatment | 13.74         | 13.74       | 13.06    | 0.007     |
| O <sub>2</sub> <sup>-</sup> content   | Cultivar           | 0.05          | 0.05        | 3.47     | 0.100     |
|                                       | Treatment          | 0.82          | 0.82        | 59.59    | 0.000**** |
|                                       | Cultivar&Treatment | 0.10          | 0.10        | 7.41     | 0.026     |
| SOD activity                          | Cultivar           | 23776.98      | 23776.98    | 138.02   | 0.000**** |
|                                       | Treatment          | 26254.52      | 26254.52    | 152.40   | 0.000**** |
|                                       | Cultivar&Treatment | 29182.12      | 29182.12    | 169.40   | 0.000**** |
| POD activity                          | Cultivar           | 4243504.38    | 4243504.38  | 207.80   | 0.000**** |
|                                       | Treatment          | 84407.91      | 84407.91    | 4.13     | 0.076     |
|                                       | Cultivar&Treatment | 3974708.60    | 3974708.60  | 194.64   | 0.000**** |
| CAT activity                          | Cultivar           | 568.37        | 568.37      | 27.08    | 0.001     |
|                                       | Treatment          | 544.18        | 544.18      | 25.93    | 0.001     |
|                                       | Cultivar&Treatment | 423.41        | 423.41      | 20.17    | 0.002     |
| APX activity                          | Cultivar           | 493.40        | 493.40      | 20.19    | 0.002     |
|                                       | Treatment          | 520.59        | 520.59      | 21.30    | 0.002     |
|                                       | Cultivar&Treatment | 780.26        | 780.26      | 31.92    | 0.000**** |
| MDHR activity                         | Cultivar           | 0.68          | 0.68        | 2.34     | 0.164     |
|                                       | Treatment          | 10.62         | 10.62       | 36.35    | 0.000**** |
|                                       | Cultivar&Treatment | 21.58         | 21.58       | 73.85    | 0.000**** |
| DHAR activity                         | Cultivar           | 1103.01       | 1103.01     | 29.67    | 0.001     |
|                                       | Treatment          | 1256.03       | 1256.03     | 33.79    | 0.000**** |
|                                       | Cultivar&Treatment | 2326.61       | 2326.61     | 62.59    | 0.000**** |
| GR activity                           | Cultivar           | 1.56          | 1.56        | 37.11    | 0.000**** |
|                                       | Treatment          | 4.31          | 4.31        | 102.55   | 0.000**** |
|                                       | Cultivar&Treatment | 1.30          | 1.30        | 31.02    | 0.001     |
| ASA content                           | Cultivar           | 4.88          | 4.88        | 55.89    | 0.000**** |
|                                       | Treatment          | 3.96          | 3.96        | 45.38    | 0.000**** |
|                                       | Cultivar&Treatment | 1.51          | 1.51        | 17.35    | 0.003     |
| DHA content                           | Cultivar           | 0.02          | 0.02        | 55.87    | 0.000**** |

|                     |                    |         |         |        |          |
|---------------------|--------------------|---------|---------|--------|----------|
|                     | Treatment          | 0.04    | 0.04    | 146.21 | 0.000*** |
|                     | Cultivar&Treatment | 0.01    | 0.01    | 18.51  | 0.003    |
|                     | Cultivar           | 659.94  | 659.94  | 12.81  | 0.007    |
| ASA/DHA             | Treatment          | 1972.50 | 1972.50 | 38.30  | 0.000*** |
|                     | Cultivar&Treatment | 614.63  | 614.63  | 11.93  | 0.009    |
|                     | Cultivar           | 0.00007 | 0.00007 | 26.44  | 0.001    |
| GSH content         | Treatment          | 0.00004 | 0.00004 | 15.94  | 0.004    |
|                     | Cultivar&Treatment | 0.00013 | 0.00013 | 50.00  | 0.000*** |
|                     | Cultivar           | 0.40    | 0.40    | 5.46   | 0.048    |
| GSSG content        | Treatment          | 2.26    | 2.26    | 30.94  | 0.001    |
|                     | Cultivar&Treatment | 2.83    | 2.83    | 38.72  | 0.000*** |
|                     | Cultivar           | 0.00    | 0.00    | 5.13   | 0.053    |
| GSH/GSSG            | Treatment          | 0.00    | 0.00    | 7.04   | 0.029    |
|                     | Cultivar&Treatment | 0.00    | 0.00    | 10.41  | 0.012    |
|                     | Cultivar           | 60.78   | 60.78   | 52.47  | 0.000*** |
| Glycolic acid       | Treatment          | 15.75   | 15.75   | 13.60  | 0.006    |
|                     | Cultivar&Treatment | 0.74    | 0.74    | 0.64   | 0.446    |
|                     | Cultivar           | 68.02   | 68.02   | 46.73  | 0.000*** |
| Succinic acid       | Treatment          | 188.21  | 188.21  | 129.31 | 0.000*** |
|                     | Cultivar&Treatment | 242.97  | 242.97  | 166.94 | 0.000*** |
|                     | Cultivar           | 26.14   | 26.14   | 4.88   | 0.058    |
| Fumaric acid        | Treatment          | 360.30  | 360.30  | 67.32  | 0.000*** |
|                     | Cultivar&Treatment | 12.76   | 12.76   | 2.38   | 0.161    |
|                     | Cultivar           | 208.05  | 208.05  | 383.87 | 0.000*** |
| Malic acid          | Treatment          | 65.14   | 65.14   | 120.19 | 0.000*** |
|                     | Cultivar&Treatment | 158.73  | 158.73  | 292.87 | 0.000*** |
|                     | Cultivar           | 9.14    | 9.14    | 19.37  | 0.002    |
| Linolenic acid      | Treatment          | 4.50    | 4.50    | 9.54   | 0.015    |
|                     | Cultivar&Treatment | 2.52    | 2.52    | 5.34   | 0.050    |
|                     | Cultivar           | 0.22    | 0.22    | 45.55  | 0.000*** |
| Cis-sinapinic acid  | Treatment          | 3.79    | 3.79    | 769.12 | 0.000*** |
|                     | Cultivar&Treatment | 0.13    | 0.13    | 26.60  | 0.001    |
|                     | Cultivar           | 228.94  | 228.94  | 2.44   | 0.157    |
| Serine              | Treatment          | 1090.72 | 1090.72 | 11.62  | 0.009    |
|                     | Cultivar&Treatment | 573.84  | 573.84  | 6.11   | 0.039    |
|                     | Cultivar           | 58.38   | 58.38   | 2.37   | 0.162    |
| Allothreonine       | Treatment          | 874.21  | 874.21  | 35.54  | 0.000*** |
|                     | Cultivar&Treatment | 452.31  | 452.31  | 18.39  | 0.003    |
|                     | Cultivar           | 134.39  | 134.39  | 38.30  | 0.000*** |
| 4-Aminobutyric acid | Treatment          | 6.09    | 6.09    | 1.73   | 0.224    |
|                     | Cultivar&Treatment | 304.50  | 304.50  | 86.78  | 0.000*** |
|                     | Cultivar           | 16.96   | 16.96   | 2.13   | 0.183    |
| Tagatose            | Treatment          | 1533.84 | 1533.84 | 192.26 | 0.000*** |
|                     | Cultivar&Treatment | 98.61   | 98.61   | 12.36  | 0.008    |
|                     | Cultivar           | 0.00    | 0.00    | 0.00   | 0.995    |
| Fructose acid       | Treatment          | 148.75  | 148.75  | 132.79 | 0.000*** |
|                     | Cultivar&Treatment | 12.73   | 12.73   | 11.36  | 0.010    |
|                     | Cultivar           | 6.85    | 6.85    | 6.26   | 0.037    |
| Glucoheptose        | Treatment          | 34.36   | 34.36   | 31.40  | 0.001    |
|                     | Cultivar&Treatment | 21.95   | 21.95   | 20.06  | 0.002    |
|                     | Cultivar           | 0.99    | 0.99    | 542.70 | 0.000*** |
| Cellobiose          | Treatment          | 1.01    | 1.01    | 551.31 | 0.000*** |
|                     | Cultivar&Treatment | 0.65    | 0.65    | 354.75 | 0.000*** |
|                     | Cultivar           | 0.01    | 0.01    | 116.97 | 0.000*** |
| Melezitose          | Treatment          | 0.01    | 0.01    | 104.56 | 0.000*** |
|                     | Cultivar&Treatment | 0.00    | 0.00    | 17.24  | 0.003*** |
|                     | Cultivar           | 114.33  | 114.33  | 35.54  | 0.000*** |
| Myo-inositol        | Treatment          | 174.04  | 174.04  | 54.10  | 0.000*** |
|                     | Cultivar&Treatment | 84.52   | 84.52   | 26.27  | 0.001    |
|                     | Cultivar           | 51.57   | 51.57   | 189.55 | 0.000*** |
| Arabitol            | Treatment          | 11.21   | 11.21   | 41.19  | 0.000*** |

|              |                    |          |          |        |          |
|--------------|--------------------|----------|----------|--------|----------|
|              | Cultivar&Treatment | 0.02     | 0.02     | 0.06   | 0.816    |
|              | Cultivar           | 13.65    | 13.65    | 0.02   | 0.898    |
| Galactinol   | Treatment          | 519.10   | 519.10   | 0.67   | 0.438    |
|              | Cultivar&Treatment | 29046.68 | 29046.68 | 37.25  | 0.000*** |
|              | Cultivar           | 60.65    | 60.65    | 435.87 | 0.000*** |
| Cellobiotol  | Treatment          | 15.20    | 15.20    | 109.22 | 0.000*** |
|              | Cultivar&Treatment | 13.85    | 13.85    | 99.54  | 0.000*** |
|              | Cultivar           | 0.03     | 0.03     | 71.28  | 0.000*** |
| Stigmasterol | Treatment          | 0.03     | 0.03     | 70.73  | 0.000*** |
|              | Cultivar&Treatment | 0.01     | 0.01     | 31.34  | 0.001    |

---
